# Supplementary material for: Elucidating the mechanisms of atmospheric new particle formation in the highly polluted Po Valley, Italy
Source: Copernicus journal article supplement (doi:10.5194/egusphere-2023-1803), 2023-09-20
Supplement: Supplementary file 1 [file egusphere-2023-1803-supplement.pdf]

## **Elucidating the mechanisms of atmospheric new particle formation in the highly polluted Po Valley, Italy**

Jing Cai<sup>1</sup>, Juha Sulo<sup>1</sup>, Yifang Gu<sup>1</sup>, Sebastian Holm<sup>1</sup>, Runlong Cai<sup>1</sup>, Steven Thomas<sup>1</sup>, Almuth Neuberger<sup>2</sup>, Fredrik Mattsson<sup>2</sup>, Marco Paglione<sup>3</sup>, Stefano Decesari<sup>3</sup>, Matteo Rinaldi<sup>3</sup>, Rujing Yin<sup>1</sup>, Diego Aliaga<sup>1</sup>, Wei Huang<sup>1</sup>, Yuanyuan Li<sup>1,4</sup>, Yvette Gramlich<sup>2</sup>, Giancarlo Ciarelli<sup>1</sup>, Lauriane Quéléver<sup>1</sup>, Nina Sarnela<sup>1</sup>, Katrianne Lehtipalo<sup>1,5</sup>, Nora Zannoni<sup>3</sup>, Cheng Wu<sup>6</sup>, Wei Nie<sup>4</sup>, Claudia Mohr<sup>7,8</sup>, Markku Kulmala<sup>1,4,9</sup>, Qiaozhi Zha<sup>1,4</sup>, Dominik Stolzenburg<sup>1,10\*</sup>, Federico Bianchi<sup>1\*</sup>

<sup>1</sup> Institute for Atmospheric and Earth System Research, Faculty of Science, University of Helsinki, Helsinki 00014, Finland

<sup>2</sup> Department of Environmental Science, Stockholm University, Stockholm 11418, Sweden

<sup>3</sup> Italian National Research Council-Institute of Atmospheric Sciences and Climate (CNR-ISAC), Bologna, 40129, Italy

<sup>4</sup> School of Atmospheric Sciences, Nanjing University, Nanjing, 210023, China

<sup>5</sup> Finnish Meteorological Institute, Helsinki, 00560, Finland

<sup>6</sup> Department of Chemistry and Molecular Biology, Atmospheric Science, University of Gothenburg, Gothenburg 41296, Sweden

<sup>7</sup> Laboratory of Atmospheric Chemistry, Paul Scherrer Institute, Villigen, 5232, Switzerland

<sup>8</sup> Department of Environmental System Science, ETH Zurich, Villigen, 5232, Switzerland

<sup>9</sup> Beijing Advanced Innovation Center for Soft Matter Science and Engineering, Beijing University of Chemical Technology, Beijing 100029, China

<sup>10</sup> Institute for Materials Chemistry, TU Wien, Vienna 1060, Austria

Correspondence to: [federico.bianchi@helsinki.fi](mailto:federico.bianchi@helsinki.fi) and [dominik.stolzenburg@tuwien.ac.at](mailto:dominik.stolzenburg@tuwien.ac.at)

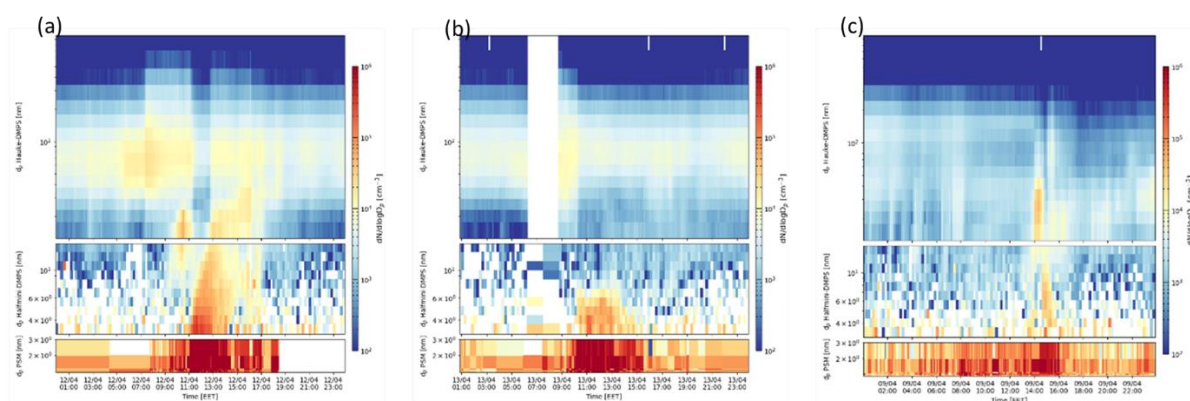

**Figure S1.** Particle size distributions (x-axis time, y-axis size in nm and color code is number concentration in  $dN/d\log D_p$ ) from 1.3 – 800 nm as measured by three different instruments (upper panel Hauke-DMPS, middle panel Halfmini-DMPS and lower panel PSM) for (a) an NPF with growth event (12<sup>th</sup> of April), (b) an NPF with growth event, and (c) a non-NPF day.

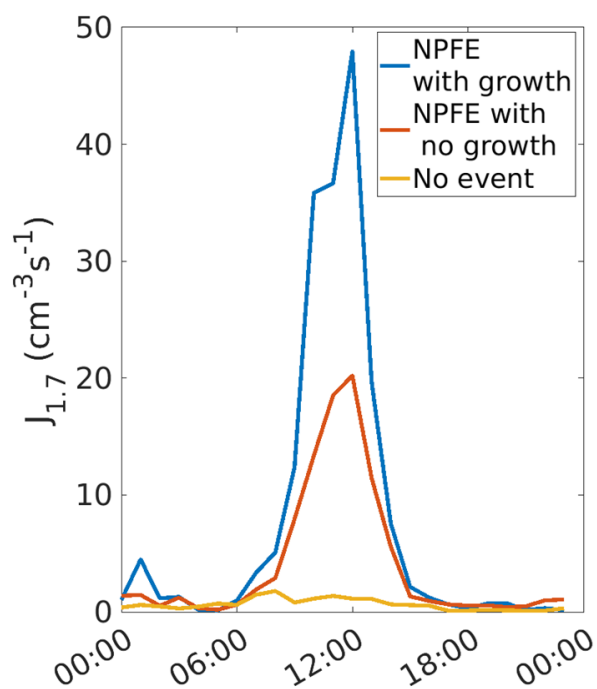

**Figure S2.** The average formation rate of 1.7 nm particles ( $J_{1.7}$ ) during NPF with growth, NPF without growth and no NPF events during our sampling period.

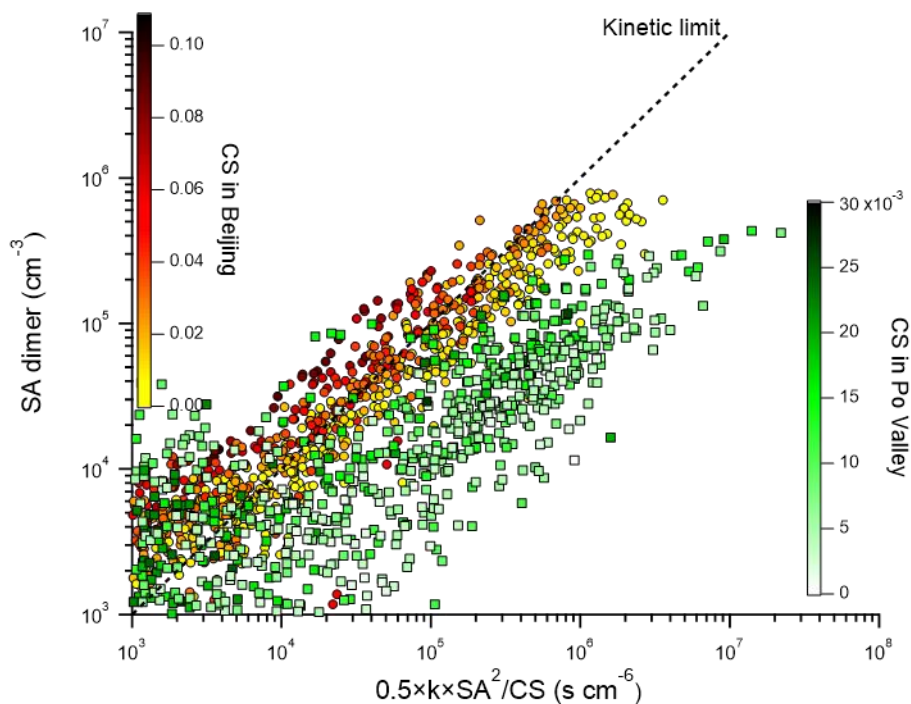

**Figure S3.** The relationship between sulfuric acid dimer concentration (SA dimer), monomer concentration (SA), and the CS in the Po Valley region. The theoretical molecular collision rate constant ( $k$ ) was set as  $4 \times 10^{-10} \text{ cm}^3 \text{ s}^{-1}$  (Stolzenburg et al., 2020).

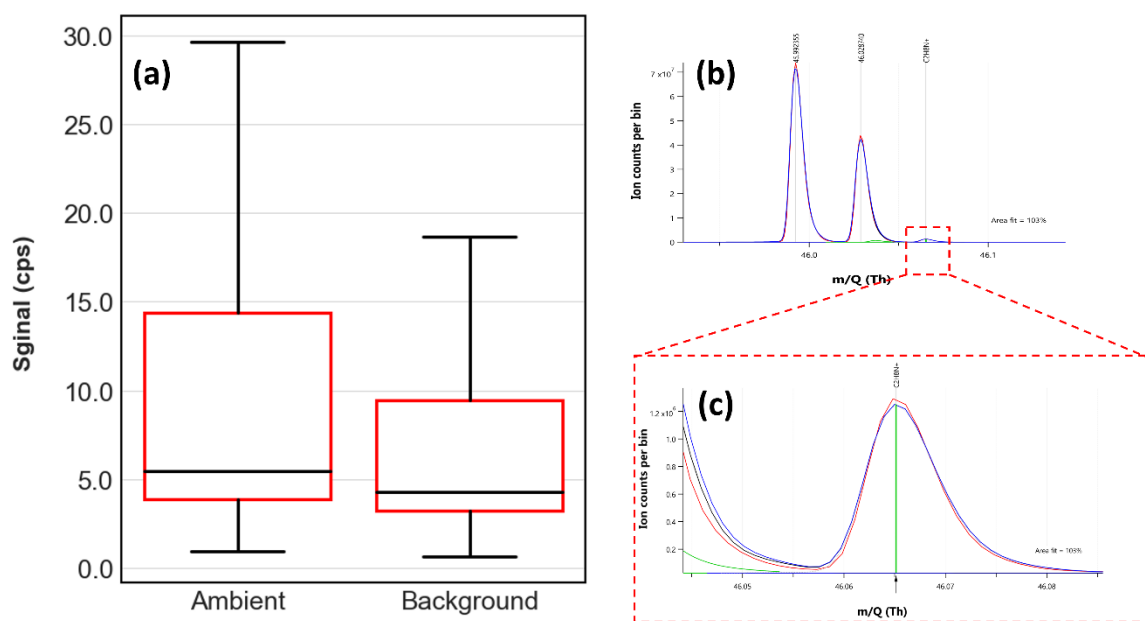

**Figure S4.** (a)  $\text{C}_2\text{H}_7\text{N}$  signal observed from March to April (excluding outliers). (b) Peak fitting at  $m/z$  46. (c) Zoomed-in view of  $\text{C}_2\text{H}_8\text{N}^+$  (DMA) peak fitting.

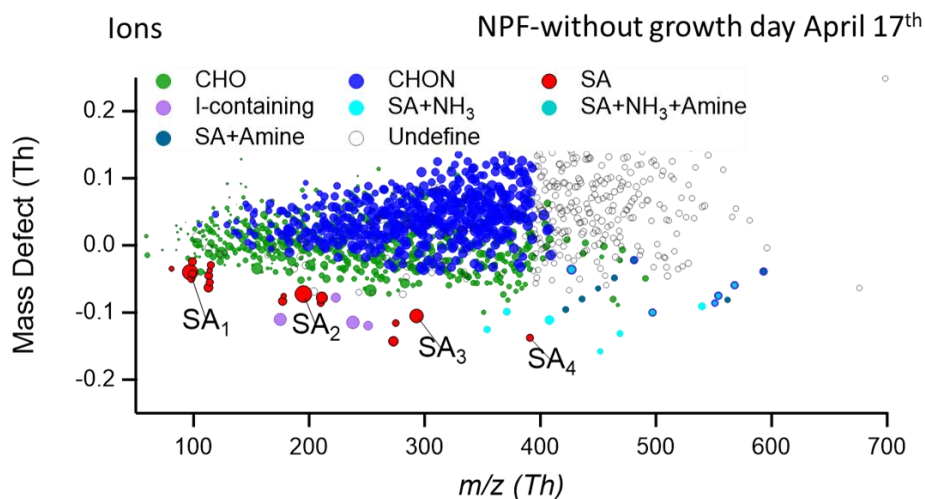

**Figure S5.** Mass defect plots for ion clusters during the NPF without growth day (10:00 – 14:00 LT of April 17<sup>th</sup>). The size of the dots is proportional to the logarithm of the signal intensity of each cluster.

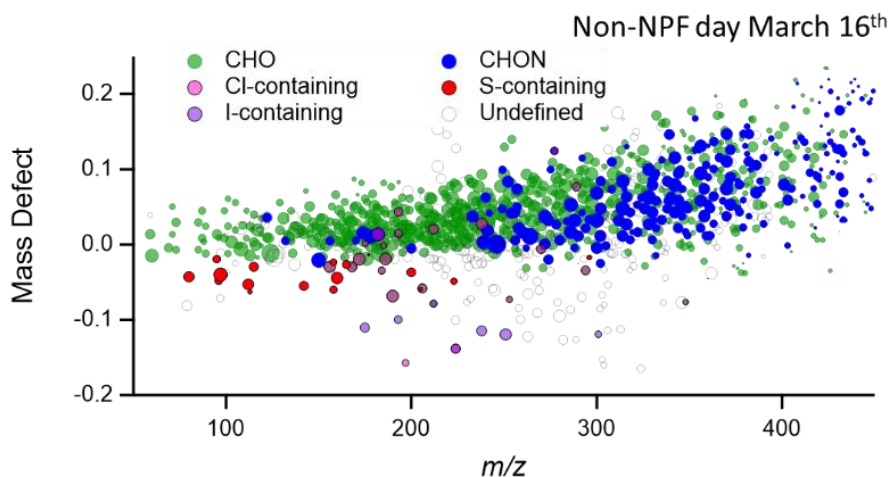

**Figure S6.** Mass defect plots for neutral clusters during the non NPF period (10:00 – 14:00 LT of March 16<sup>th</sup>). The size of the dots is proportional to the logarithm of the signal intensity of each cluster.

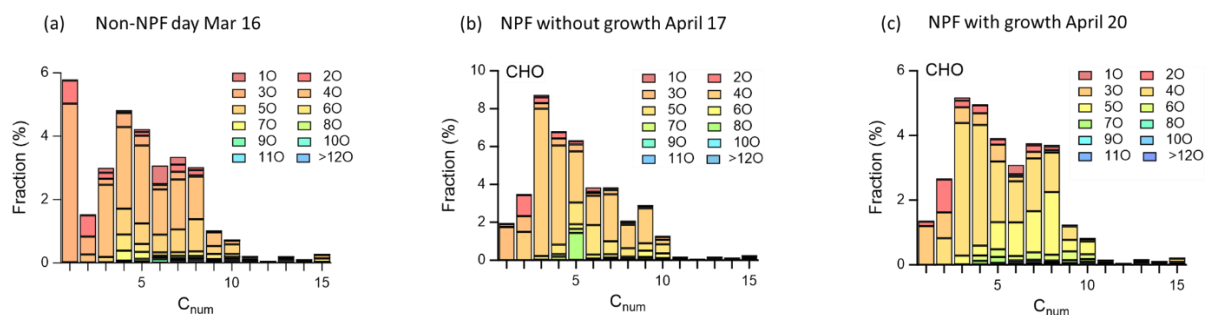

**Figure S7.** Signal fractions to total identified organic molecules with different numbers of oxygen and carbon atoms of CHO compounds in the (a) non-NPF day (March 16), (b) NPF with no growth day (April 17) and NPF with growth day (April 20) during peak hours (10:00 – 14:00 LT).

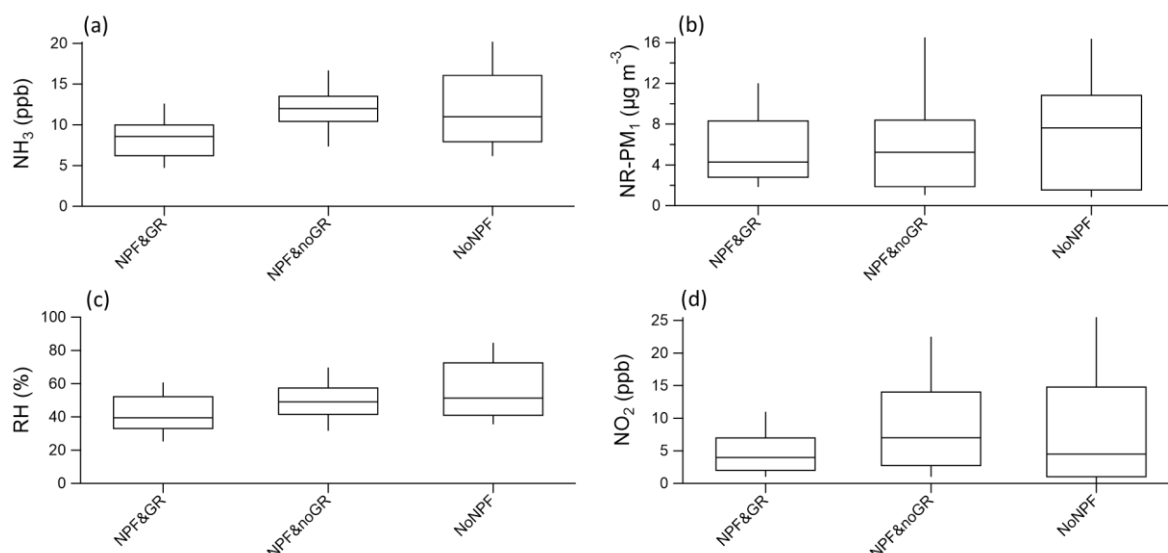

**Figure S8.** (a) the  $\text{NH}_3$ , (b)  $\text{NR-PM}_{10}$ , (c) RH, and (d)  $\text{NO}_2$  for NPF with growth (NPF&GR), NPF without growth (NPF&noGR) and no NPF event (NoNPF) days. In each box plot, the median (middle horizontal line), 25<sup>th</sup> and 75<sup>th</sup> percentiles (bottom and top ends of the box, respectively), and 10<sup>th</sup> and 90<sup>th</sup> percentiles (bottom and top whiskers, respectively) are presented. The  $\text{NR-PM}_{10}$  is from a co-located aerosol mass spectrometer measurement (Paglione et al., 2020).

**Table S1.** Ambient  $\text{NH}_3$  and DMA concentrations from different measurement sites

| Site      | Sampling period   | DMA (ppt)      | $\text{NH}_3$ (ppb) | Instrument                                                     | Ref                                   |
|-----------|-------------------|----------------|---------------------|----------------------------------------------------------------|---------------------------------------|
| Beijing   | Oct 2018-Nov 2018 | 7.3            | 20.8                | $\text{H}_3\text{O}^+$ -tof-CIMS (both DMA and $\text{NH}_3$ ) | (Cai et al., 2021)                    |
| Wangdu    | Dec 2018-Jan 2019 | 14.6           | 31.2                | Vocus (DMA), DOAS ( $\text{NH}_3$ )                            | (Wang et al., 2020; Liu et al., 2023) |
| Shanghai  | Jul 2015-Aug 2015 | 40             | 6.2                 | Protonated ethanol-CIMS (DMA), DOAS ( $\text{NH}_3$ )          | (Yao et al., 2016; Wang et al., 2015) |
| Nanjing   | Sep 2022-Oct 2022 | 20.8           | 13.1                | Vocus (DMA), Picarro ( $\text{NH}_3$ )                         | unpublished data                      |
| Hyytiälä  | Mar-Dec 2015      | < LOD          | 0.066               | MARGA (both DMA and $\text{NH}_3$ )                            | (Hemmilä et al., 2018)                |
| Po Valley | Mar 2022-May 2022 | Not quantified | 10.6                | Vocus (DMA), Teledyne-API ( $\text{NH}_3$ )                    | this study                            |

**Note:** The Limit of Detection (LOD) for DMA with instrument for Measuring AeRosols and Gases in Ambient Air (MARGA) is 1.7 ppt and the LOD for DMA with Vocus is ~2 ppt.

DOAS is short for differential optical absorption spectroscopy.

## Reference

- Cai, R., Yan, C., Yang, D., Yin, R., Lu, Y., Deng, C., Fu, Y., Ruan, J., Li, X., Kontkanen, J., Zhang, Q., Kangasluoma, J., Ma, Y., Hao, J., Worsnop, D. R., Bianchi, F., Paasonen, P., Kerminen, V. M., Liu, Y., Wang, L., Zheng, J., Kulmala, M., and Jiang, J.: Sulfuric acid–amine nucleation in urban Beijing, *Atmos. Chem. Phys.*, 21, 2457–2468, 10.5194/acp-21-2457-2021, 2021.
- Hemmilä, M., Hellén, H., Virkkula, A., Makkonen, U., Praplan, A. P., Kontkanen, J., Ahonen, L., Kulmala, M., and Hakola, H.: Amines in boreal forest air at SMEAR II station in Finland, *Atmospheric Chemistry and Physics*, 18, 6367–6380, 10.5194/acp-18-6367-2018, 2018.
- Liu, P., Chen, H., Song, Y., Xue, C., Ye, C., Zhao, X., Zhang, C., Liu, J., and Mu, Y.: Atmospheric ammonia in the rural North China Plain during wintertime: Variations, sources, and implications for HONO heterogeneous formation, *Sci Total Environ*, 861, 160768, 10.1016/j.scitotenv.2022.160768, 2023.
- Paglione, M., Gilardoni, S., Rinaldi, M., Decesari, S., Zanca, N., Sandrini, S., Giulianelli, L., Bacco, D., Ferrari, S., Poluzzi, V., Scotto, F., Trentini, A., Poulain, L., Herrmann, H., Wiedensohler, A., Canonaco, F., Prévôt, A. S. H., Massoli, P., Carbone, C., Facchini, M. C., and Fuzzi, S.: The impact of biomass burning and aqueous-phase processing on air quality: a multi-year source apportionment study in the Po Valley, Italy, *Atmospheric Chemistry and Physics*, 20, 1233–1254, 10.5194/acp-20-1233-2020, 2020.
- Stolzenburg, D., Simon, M., Ranjithkumar, A., Kürten, A., Lehtipalo, K., Gordon, H., Ehrhart, S., Finkenzeller, H., Pichelstorfer, L., Nieminen, T., He, X.-C., Brilke, S., Xiao, M., Amorim, A., Baalbaki, R., Baccarini, A., Beck, L., Bräkling, S., Caudillo Murillo, L., Chen, D., Chu, B., Dada, L., Dias, A., Dommen, J., Duplissy, J., El Haddad, I., Fischer, L., Gonzalez Carracedo, L., Heinritzi, M., Kim, C., Koenig, T. K., Kong, W., Lamkaddam, H., Lee, C. P., Leiminger, M., Li, Z., Makhmutov, V., Manninen, H. E., Marie, G., Marten, R., Müller, T., Nie, W., Partoll, E., Petäjä, T., Pfeifer, J., Philippov, M., Rissanen, M. P., Rörup, B., Schobesberger, S., Schuchmann, S., Shen, J., Sipilä, M., Steiner, G., Stozhkov, Y., Tauber, C., Tham, Y. J., Tomé, A., Vazquez-Pufleau, M., Wagner, A. C., Wang, M., Wang, Y., Weber, S. K., Wimmer, D., Wlasits, P. J., Wu, Y., Ye, Q., Zauner-Wieczorek, M., Baltensperger, U., Carslaw, K. S., Curtius, J., Donahue, N. M., Flagan, R. C., Hansel, A., Kulmala, M., Lelieveld, J., Volkamer, R., Kirkby, J., and Winkler, P. M.: Enhanced growth rate of atmospheric particles from sulfuric acid, *Atmospheric Chemistry and Physics*, 20, 7359–7372, 10.5194/acp-20-7359-2020, 2020.
- Wang, S., Nan, J., Shi, C., Fu, Q., Gao, S., Wang, D., Cui, H., Saiz-Lopez, A., and Zhou, B.: Atmospheric ammonia and its impacts on regional air quality over the megacity of Shanghai, China, *Scientific Reports*, 5, 10.1038/srep15842, 2015.
- Wang, Y., Yang, G., Lu, Y., Liu, Y., Chen, J., and Wang, L.: Detection of gaseous dimethylamine using vocus proton-transfer-reaction time-of-flight mass spectrometry, *Atmospheric Environment*, 243, 10.1016/j.atmosenv.2020.117875, 2020.
- Yao, L., Wang, M.-Y., Wang, X.-K., Liu, Y.-J., Chen, H.-F., Zheng, J., Nie, W., Ding, A.-J., Geng, F.-H., Wang, D.-F., Chen, J.-M., Worsnop, D. R., and Wang, L.: Detection of atmospheric gaseous amines and amides by a high-resolution time-of-flight chemical ionization mass spectrometer with protonated ethanol reagent ions, *Atmospheric Chemistry and Physics*, 16, 14527–14543, 10.5194/acp-16-14527-2016, 2016.
